# Supplementary material for: Benzoxazine-based phosphinated bisphenols and their application in preparing flame-retardant, low dielectric cyanate ester thermosets
Source: Royal Society of Chemistry journal article supplement (doi:10.1039/c2py00528j), 2012-01-01
Supplement: c2py00528j.pdf [file c2py00528j.pdf]

## Supplementary information

Benzoxazine-based phosphinated bisphenols and their application in preparing flame-retardant, low dielectric cyanate esters thermosets

Hou Chien Chang, Hung Tse Lin, Ching Hsuan Lin\*

Department of Chemical Engineering, National Chung Hsing University, Taichung, Taiwan

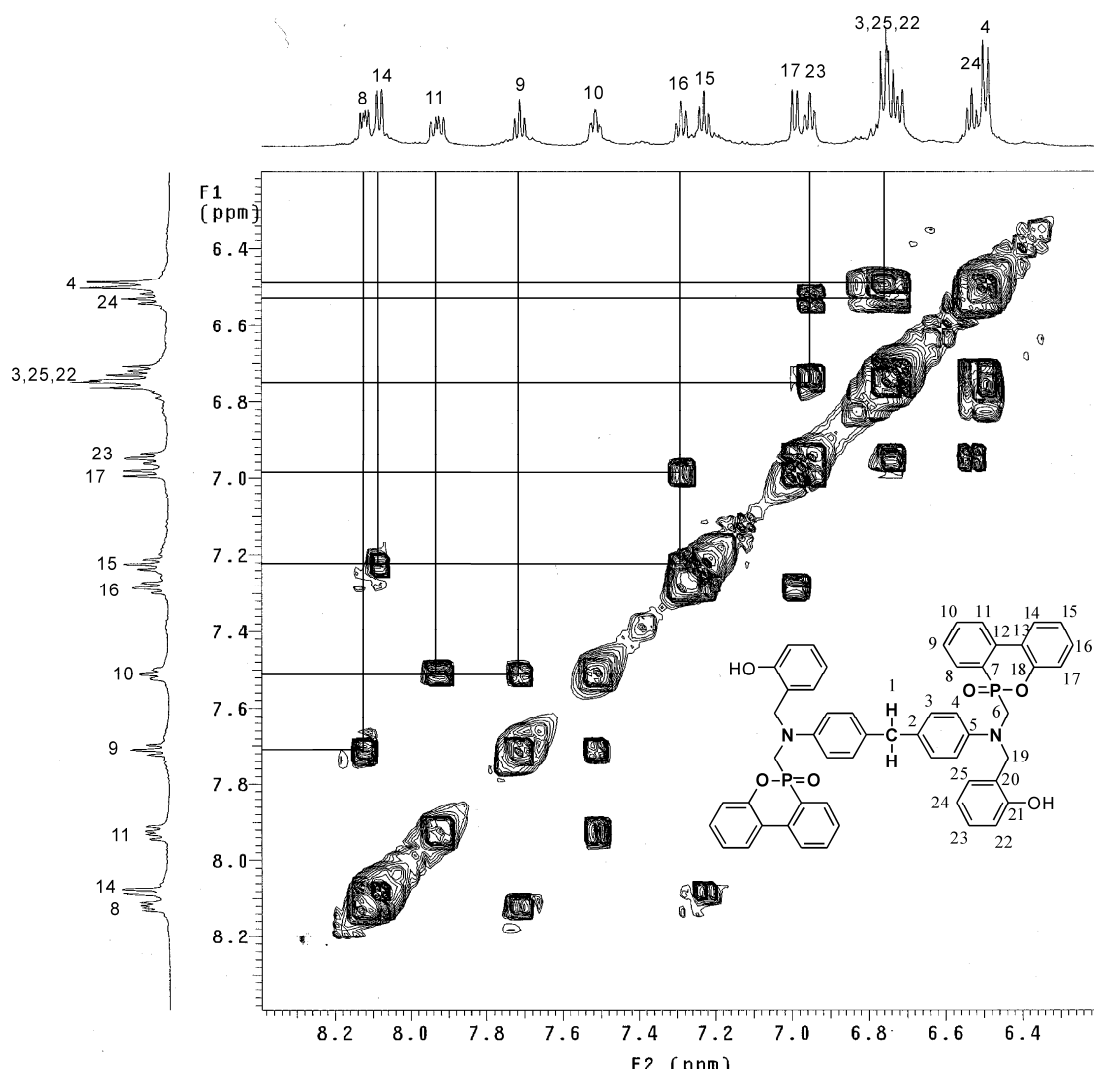

Figure S1.  $^1\text{H}$ - $^1\text{H}$  COSY NMR spectrum of (1).

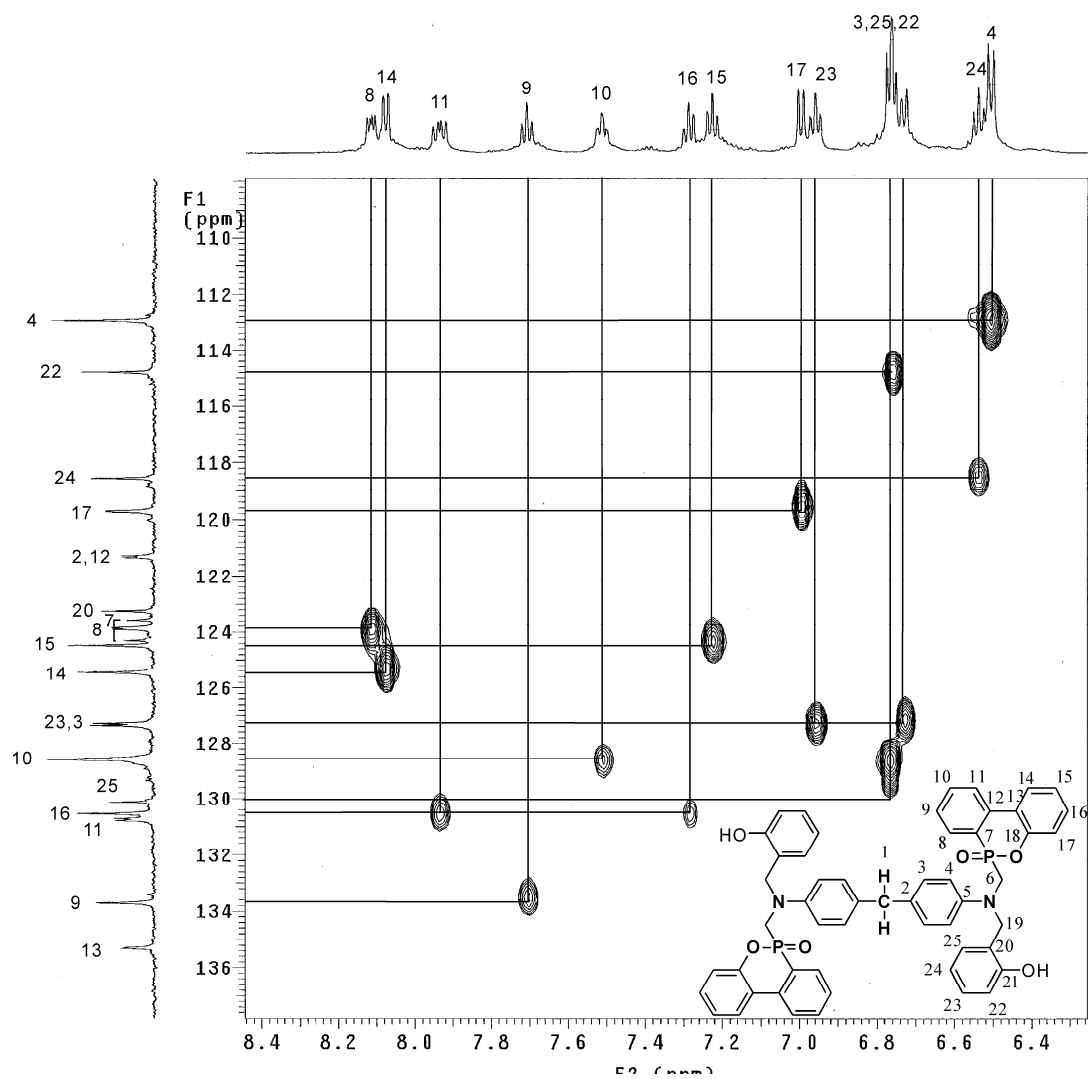

Figure S2.  $^1\text{H}$ - $^{13}\text{C}$  HETCOR NMR spectrum of (1).

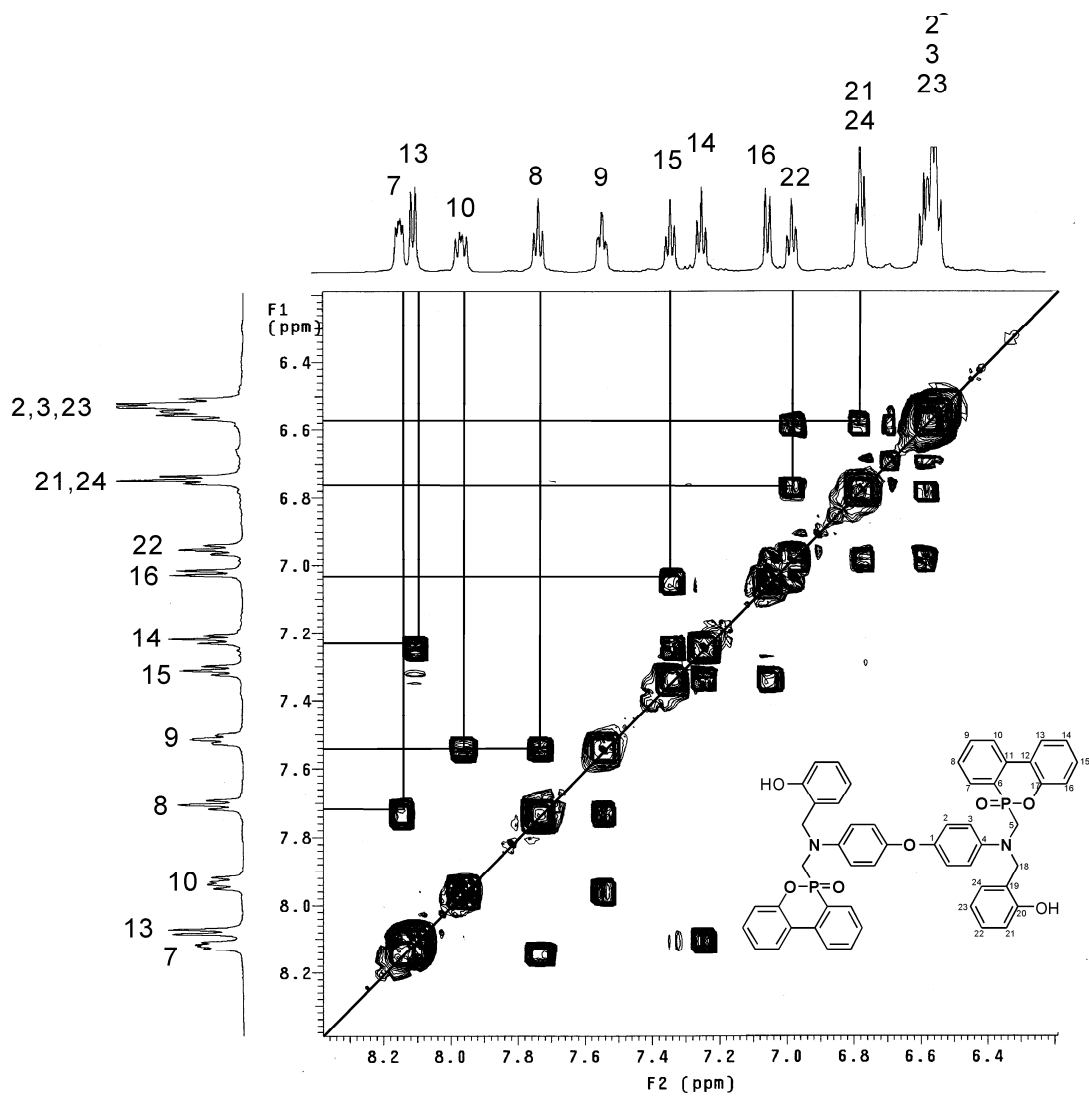

Figure S3.  $^1\text{H}$ - $^1\text{H}$  COSY NMR spectrum of (2).

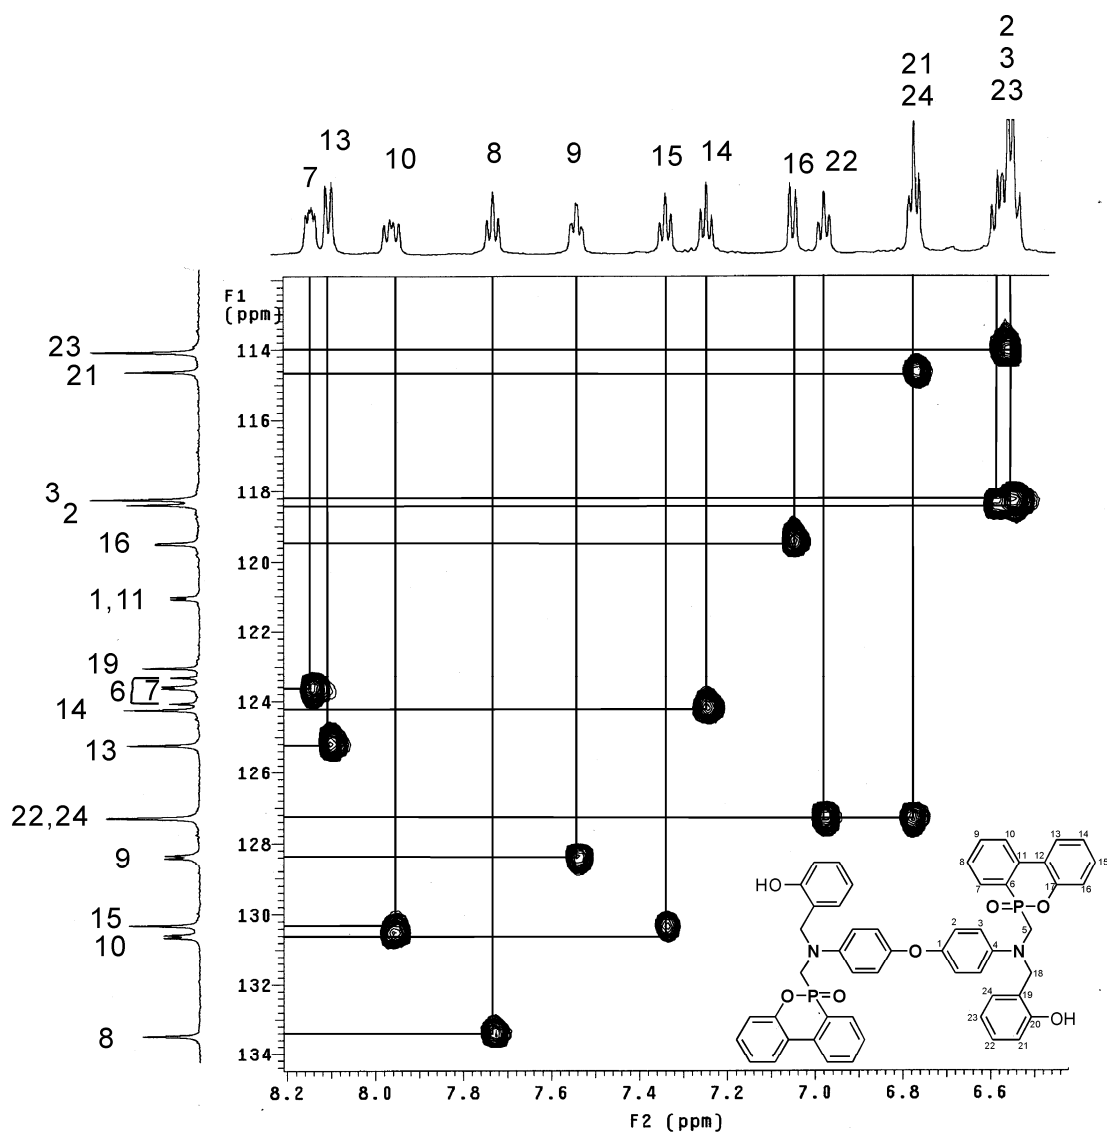

Figure S4.  $^1\text{H}$ - $^{13}\text{C}$  HETCOR NMR spectrum of (2).

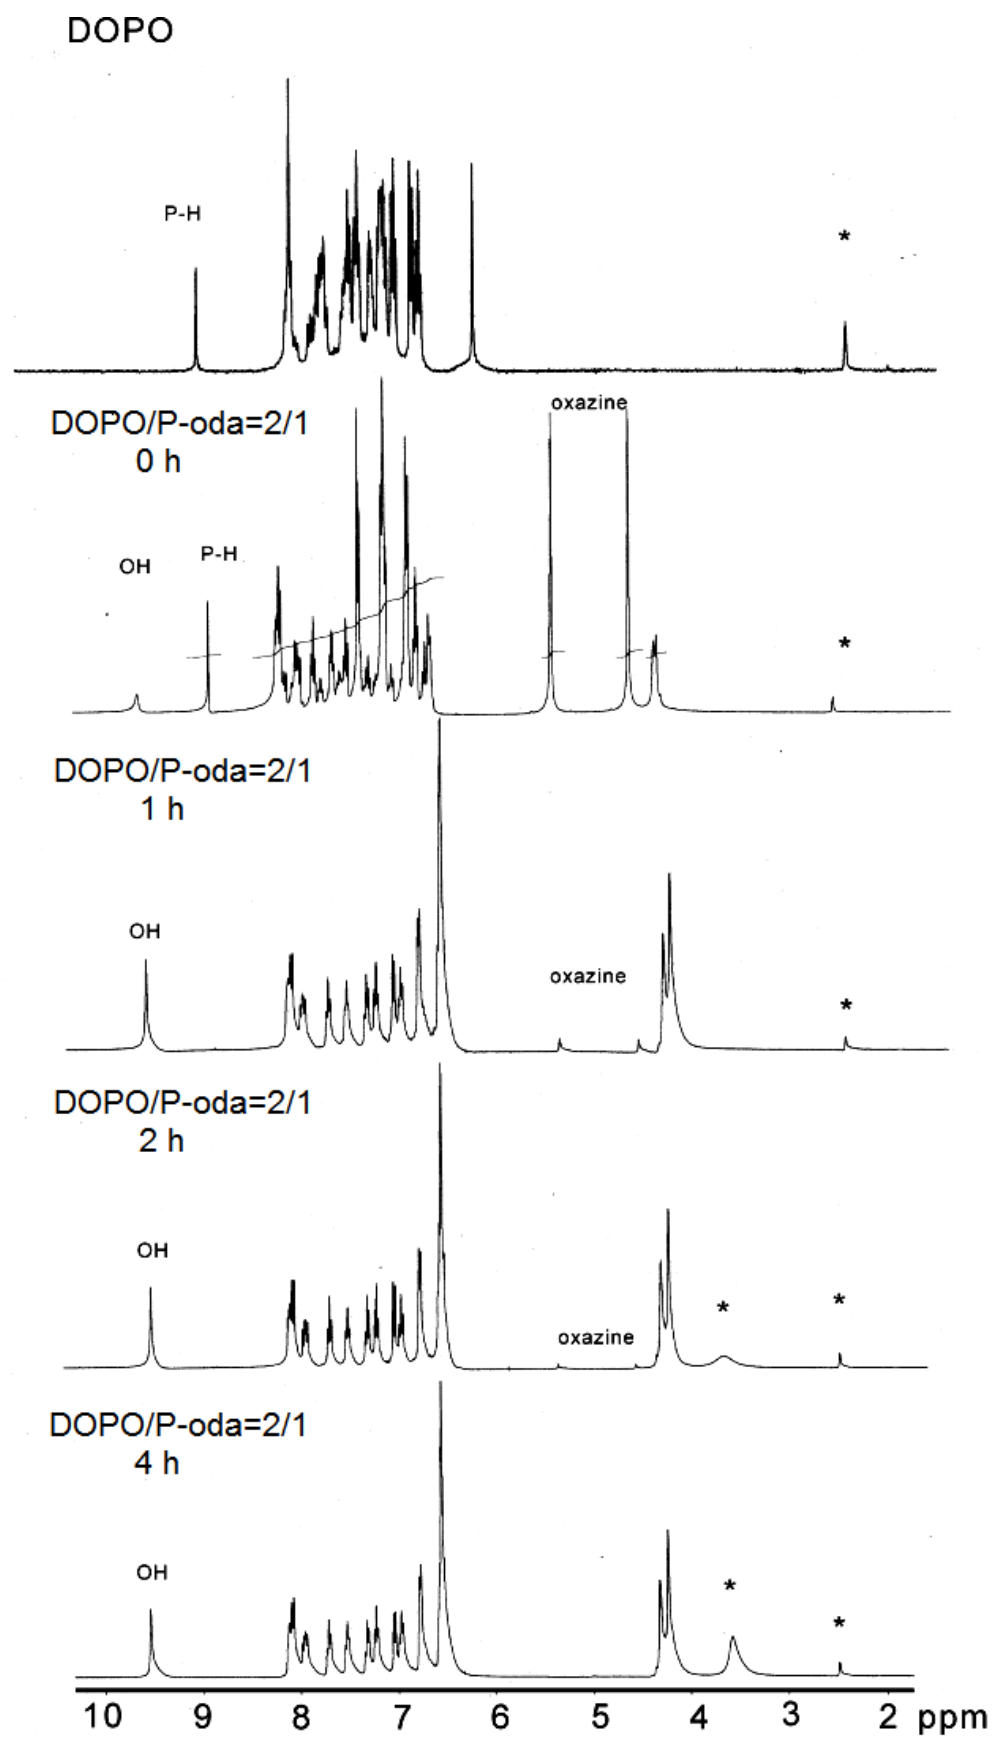

**Figure S5.**  $^1\text{H}$ -NMR trace of DOPO/P-oda mixture (2/1 molar ratio) in  $\text{DMSO-}d_6$  at room temperature.

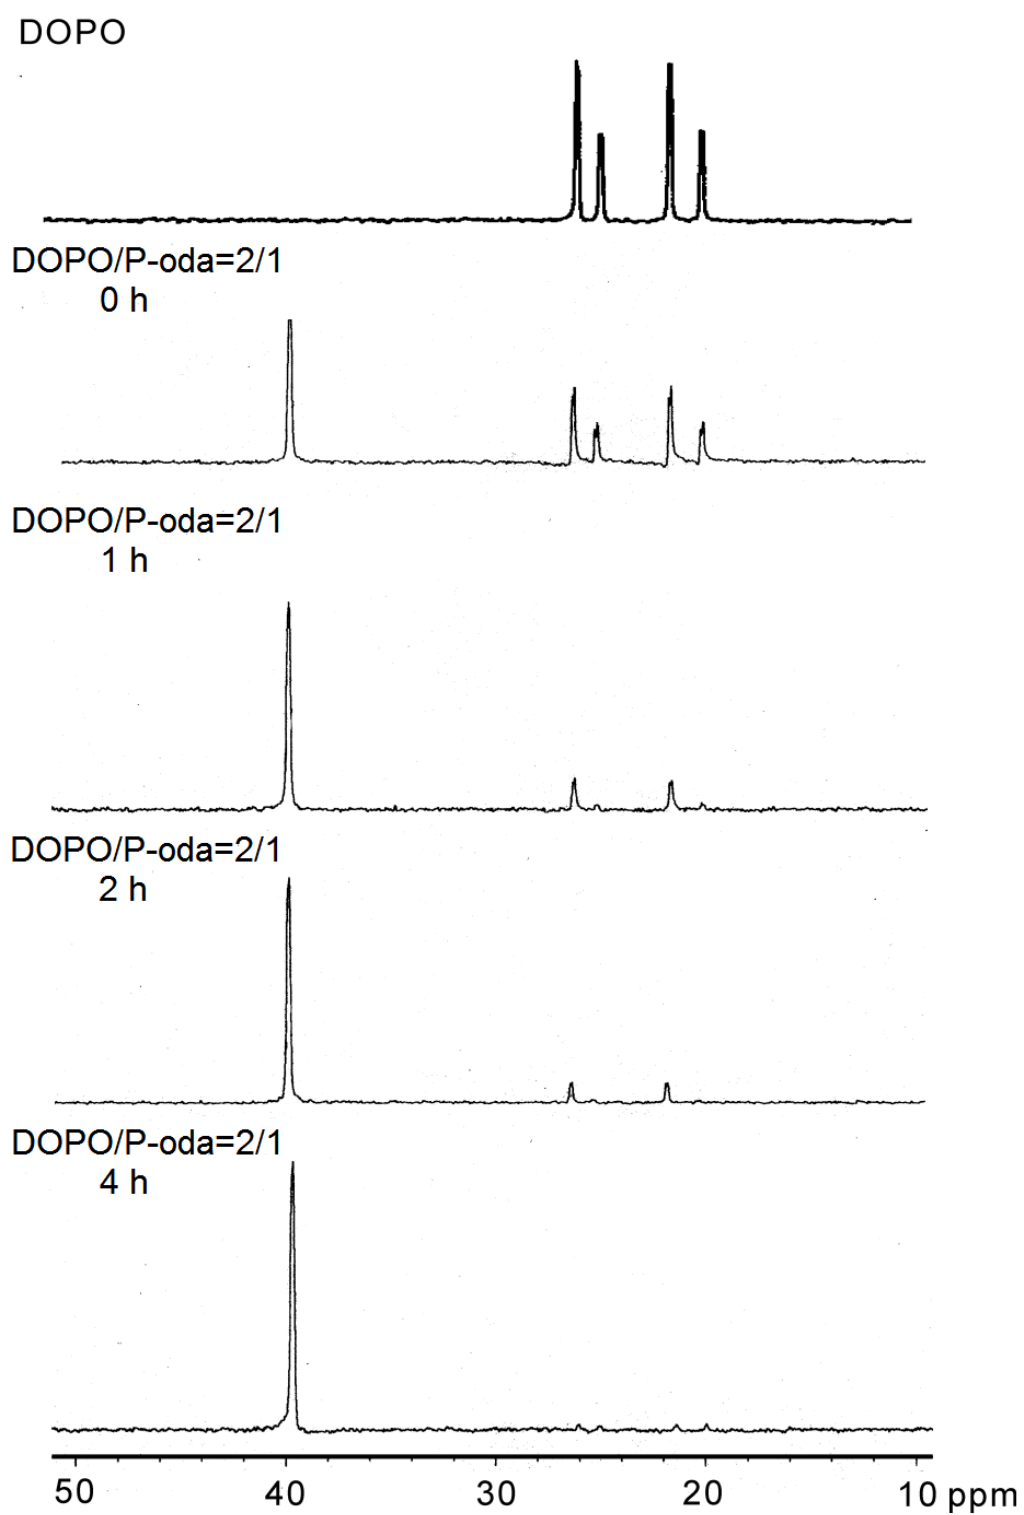

**Figure S6.**  $^{31}\text{P}$ -NMR trace DOPO/P-oda mixture in  $\text{DMSO-}d_6$  at room temperature.
